# Supplementary material for: Transcriptional and Chemical Changes in Soybean Leaves in Response to Long-Term Aphid Colonization
Source: Front Plant Sci. 2019 Mar 13;10:310. doi: 10.3389/fpls.2019.00310 (PMC6424911; doi:10.3389/fpls.2019.00310)
Supplement: TABLE S4 — Ferritin genes differentially expressed in resistant plants. [file Table_4.XLSX]

## Sheet: Ferritin
Ferritin Results
The microarray results for the 21 day time point and statistical model genetic effect coefficients for the 1, 7, and 21 day time points are shown for all Glycine max transcripts that were annotated as ferritin. The microarray changes are shown as log2 differences (as opposed to fold changes) so they can be easily compared to the statistical model coefficients. The type of ferritin was unknown for…
			Genetic Effect (log2-transformed)			Day 21 Microarray Results
Probe Set	Gene	Type	Day 1	Day 7	Day 21	log2 difference	p-value	q-value
Gma.13352.1.S1_at	Glyma.18g205800	1	1.45892	1.09523	1.46717	1.46332	0.00389402	0.999993
GmaAffx.93603.1.S1_s_at	Glyma.18g205800	1	0.136636	1.08798	2.11079	2.12541	0.000342717	0.444976
Gma.2505.1.S1_a_at	Glyma.01g124500	2	1.40542	1.15318	1.63456	1.63737	0.00121443	0.788393
Gma.2505.1.S1_at	Glyma.01g124500	2	0.974632	1.63692	2.50421	2.51079	0.000365961	0.455485
Gma.2505.2.S1_x_at	Glyma.03g050100	2	1.16623	0.844456	1.42698	1.42917	0.00206524	0.999993
Gma.2505.2.S1_at	Glyma.03g050100	2	1.21503	0.668447	1.21993	1.21441	0.00240128	0.999993
Gma.1160.1.S1_at	Glyma.18g024600	3	0.20646	-0.422316	-0.117853	-0.129974	0.755672	0.999993
Gma.1160.1.S1_s_at	Glyma.18g024600	3	-0.367703	-0.637022	0.0753597	0.070663	0.809474	0.999993
GmaAffx.78882.1.A1_at	Glyma.18g024600	3	0.317855	-0.0844485	0.0415336	0.0250846	0.886266	0.999993
GmaAffx.81981.1.S1_at	Glyma.18g024600	3	-0.43291	-0.56293	0.488074	0.47549	0.130684	0.999993
Gma.1586.1.S1_at	Glyma.14g056800	4	0.830877	1.44955	1.12867	1.14104	0.00366446	0.999993
Gma.1089.1.S1_at	Glyma.07g155200		0.951739	1.66441	1.89413	1.92188	0.00103435	0.75137
Gma.1089.1.S1_s_at	Glyma.07g155200		0.793545	1.53629	2.07231	2.09537	0.000690164	0.590608
